# Supplementary material for: 特集によせて( バイオマテリアルと生物工学 : マテリアルの魅力を探る)
Source: Royal Society of Chemistry journal article supplement (doi:10.1039/b209765f), 2003-11-25
Supplement: b209765f.doc [file b209765f.doc]

## Supplementary data


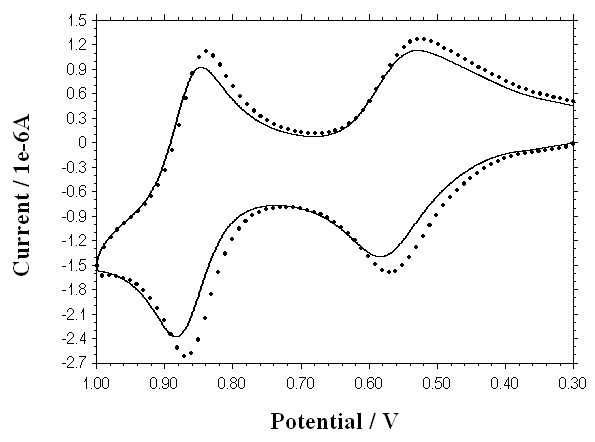


CV data for dendrimer **1** recorded in the absence (____) ofand in the presence (**…..**) of an excess of 1,4-dimethoxybenzene


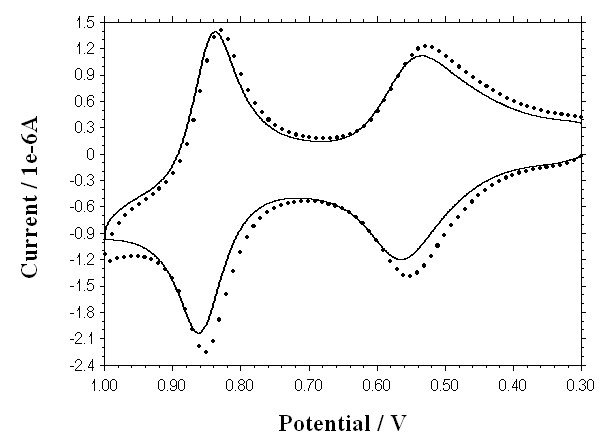


CV data for dendrimer **2** recorded in the absence (____) ofand in the presence (**…..**) of an excess of 1,4-dimethoxybenzene
